# Supplementary material for: Subclinical Atherosclerosis in Patients with Rheumatoid Arthritis and Low Cardiovascular Risk: The Role of von Willebrand Factor Activity
Source: PLoS One. 2015 Aug 6;10(8):e0130462. doi: 10.1371/journal.pone.0130462 (PMC4527675; doi:10.1371/journal.pone.0130462)
Supplement: S1 Table — (XLSX) [file pone.0130462.s001.xlsx]

## Sheet: Sheet1
Patients ID	Age	BMI	Smokers	Exsmokers	Active smokers	Smoking yrs	Cig/d	RA/yrs	RF+	RF	CCP +	CCP	Th-KS	Th-KS yrs	KS dosage	Res.	Res yrs	MTX	MTX yrs	MTX dosis	MTX+Res	MTX+Res-yrs	Sulf	Sulf yrs	Sulf+Res	Sulf+Res yrs	VAS	No SwJ	No DJ	DAS-SE	HAQ	F.st.	DAS-CRP	SE	Fibr.	CRP	Glu	↑ Hol	Hol	↑LDL	LDL	HDL	Hol/HDL	Tgl	aPTT	D-dimer	vWF	PAI	CCA max
1	52	26.7	1	0	1	30	20	6	1	879	0		1	2	4	0		1	5	10	0		0		0		3	0	0	2.3	0	1.5	1.47	25	3.2	2.7	5	0	4.54	0	1.9	1.73	2.62	1.88	36	209	1.07	3.53	0.8
2	34	23.7	0	0	0			2	1	41	0		1	1	10	1	2	1	2	7.5	1	2	0		0		5	0	3	2.29	0.13	1.5	2.25	6	2.4	1.03	4.7	0	3.95	0	2.4	1.33	2.97	0.53	33	563	0.86	2.6	0.7
3	35	22.34	0	0	0			13	1	103	0		1	1	6	1	8	1	7	10	1	7	1	1	1	1	3	0	2	1.96	0	1.5	2.1	5	2.3	1.36	5.3	0	5.54	0	2.8	2.49	2.22	0.55	36	143	0.66	4.02	0.7
4	43	20.2	1	0	1	25	40	8	1	25	1	30	0			1	1	1	2	15	1	1	0		0		2	0	1	2.78	0	1.5	2.15	23	4	4.3	6.4	1	6.54	1	4.6	1.09	6	1.82	32	176	1.11	5,2	1.1
5	35	28.5	0	0	0			12	0		0		0			1	9	1	5	10	1	4	0		0		3	0	5	2.06	0.25	2	2.5	3	1.7	0.37	4.3	0	4.8	0	3.3	1.1	4.36	0.86	34	162	0.78	2.38	0.8
6	42	26.4	0	0	0			5	1	52	1	65	0			1	4	1	4	10	1	4	0		0		3	0	2	2.09	0.13	2	2.29	6	1.9	3.04	5.3	0	5.06	0	3.7	1.12	4.52	0.57	32	357	0.72	2.36	0.6
7	30	21.26	1	1	0	10	20	3.5	1	60.4	0		1	1	3	1	3	1	0.5	10	1	0.5	0		0		1	0	1	2.19	0	1	1.7	10	2.5	0.56	5.4	0	5.01	0	3.5	1.15	4.36	0.7	33	174	0.35	2.48	1
8	57	28.72	1	1	0	7	10	1	1	161	0		0			0		1	1	10	0		0		0		4	0	0	2.56	0	2	1.27	36	3.2	1.03	5.2	0	5.47	0	2.7	1.49	3.67	2.66	31	138	0.76	2.58	0.8
9	51	25.91	1	1	0	25	20	3	0		0		0			1	3	1	1	10	1	1	0		0		4	0	2	2.1	0.25	1.5	1.95	6	2.6	0.51	6.2	1	6.59	0	3.4	2.57	2.56	1.28	29	125	0.23	< 0.1	1
10	58	20	1	1	0	20	20	3	1	64	1	92	1	1	5	0		1	1	10	0		0		0		3	0	3	2.27	0	1.5	2.22	6	2.9	1	4.7	0	5.15	0	2.4	2.14	2.41	1.25	30	136	1.04	1.8	1
11	48	25.81	0	0	0			18	0		1	30	1	6	5	1	7	1	5	10	1	5	0		0		3	0	2	2.6	0	2	1.78	19	2.5	0.84	4.8	0	6.1	0	3.3	2.5	2.44	0.64	32	144	0.92	1.49	0.6
12	50	25.89	1	0	1	28	20	1	0		0		1	0.5	5	1	1	1	1	10	1	1	0		0		1	0	2	2.55	0	1	2	12	3	0.56	4.9	0	4.74	0	3.1	1.28	3.7	0.83	38	317	2.97	3.16	0.7
13	53	22.68	1	1	0	35	5	7	0		0		0			1	7	0			0		0		0		3	0	0	1.65	0.13	1	1.15	10	2.5	0.52	5.1	0	6.05	1	4.3	1.43	4.23	0.8	39	135	0.79	1.84	0.9
14	48	21.83	0	0	0			20	1	165	1	390	1	20	4	1	10	1	6	7.5	1	4	0		0		5	0	3	3.02	0.13	2	2.5	17	3.1	2.84	4.1	1	6.5	0	3.5	2.5	2.6	1	32	125	1.22	3.81	0.6
15	29	20.94	1	0	1	10	10	6	0		1	30	0			0		1	4	10	0		1	6	0		6	1	1	2.54	1	3	1.98	10	2.5	0.32	4.8	0	4.63	0	3.7	1.36	3.41	0.57	35	341	1	2.34	0.6
16	42	21.2	1	0	1	20	20	5.5	1	30.7	1	18	1	3	5	1	3	1	0.6	10	0		1	3	1	3	5	0	4	3.57	0.13	2	2.4	30	3.7	0.96	5	0	5.76	0	3.6	1.53	3.76	1.42	31	221	0.95	2	0.8
17	40	22.83	0	0	0			7	0		0		1	4	5	1	7	1	3	10	1	3	0		0		3	1	2	3.7	0.13	2	2.38	40	4	1.33	4.3	1	8.02	1	5.6	1.5	5.35	2.1	33	130	0.84	3.98	0.7
18	32	17.67	0	0	0			5	0		1	30	1	2	7	1	1.5	1	2	15	1	1.5	0		0		7	3	6	4.02	0.88	2.5	3.12	19	3.3	0.77	4.1	0	5.58	1	3.87	0.97	5.75	1.62	39	182	1.06	2	0.6
19	57	18.9	1	0	1	30	10	20	1	713	1	252	1	0.5	4	1	3.5	1	13	7.5	1	3.5	0		0		5	1	10	4.65	0.88	3	3.48	37	3.2	2.05	5.3	0	6.15	1	4.2	1.22	5.04	1.62	29	239	1.19	1.7	0.6
20	39	19.38	1	0	1	15	10	4	0		1	96	1	1.5	4	1	1.5	1	1.5	12.5	1	1.5	0		0		5	0	3	2.84	0.13	2	3.04	13	3.2	16.8	5.3	0	4.8	0	2.6	1.8	2.66	0.77	33	294	0.81	2.09	0.6
21	33	23.1	0	0	0			6	0	9.9	0		1	6	4	0		0			0		0		0		3	0	2	2.45	0.37	1.5	2.79	10	2.94	15.2	4.8	0	5.98	0	3.5	2.18	2.74	0.72	32	153	0.18	1.6	0.7
22	26	20.52	0	0	0			5	1	112	0		1	2	4	1	3	1	4.5	15	1	3	0		0		2	0	1	2.78	0	2	2.41	23	3.5	10.4	5.3	1	6.5	1	4.5	1.14	5.7	1.88	39	571	0.7	3	0.7
23	32	22.21	1	0	1	9	20	9	0		0		0			1	6	1	6	10	1	6	0		0		5	1	3	3.17	1.25	3	3	14	3.4	6.3	4.3	0	3.77	0	1.43	1.63	2.31	1.3	32	188	1.27	2.79	0.6
24	31	22.6	1	0	1	10	5	4	1	874	1	22	1	3	5	1	4	1	4	12.5	1	4	0		0		3	0	3	3.33	0.13	1	3.07	27	4.6	19.2	4.4	0	4.28	0	2.3	1.74	2.56	0.55	33	274	0.73	1.8	0.7
25	47	19.6	1	0	1	20	10	2	1	201	1	90	1	2	10	1	0.5	1	2	12.5	0		1	0.5	0		4	0	5	3.53	0.13	2	3.24	24	3.3	14	5.6	1	6.28	1	4.5	1.15	5.46	1.38	43	264	0.64	2.3	0.8
26	50	35.6	1	0	1	25	20	1	1	615	1	20	0			0		1	1	10	0		0		0		5	2	7	3.56	0.5	2	3.8	10	3.9	11.2	5.4	0	5.45	0	3.2	1.63	3.41	1.39	30	133	0.76	3.87	0.9
27	56	31.25	0	0	0			17	1	543	1	100	1	10	2.5	0		1	1	7.5	0		0		0		5	3	4	4.22	0.63	2.5	3.7	38	3.6	18.5	5	0	4.98	0	2.8	1.38	3.61	1.83	27	212	1.81	5.2	0.7
28	49	23.1	1	1	0	15	10	17	1	2250	1	442	1	17	5	1	5	1	10	10	1	2	1	4	1	3	7	0	18	4.67	0.75	3	4.3	23	3.8	10	4.5	0	4.1	0	1.7	2.05	2	0.68	31	199	1.11	1.8	0.6
29	57	21.22	1	0	1	30	20	10	1	1360	1	256	1	2	5	1	1	1	1	10	1	1	0		0		8	1	10	4.75	0.88	3	3.99	40	4.9	10	4.2	0	3.68	0	2.3	0.93	3.96	0.93	33	277	2.33	1.87	0.8
30	35	17.63	0	0	0	0	0	7	0		0		1	6	10	1	6	1	5	10	1	5	0		0		7	4	12	4.93	1.3	3	4.93	28	3.2	44	3.9	0	3.36	0	1.3	1.88	1.79	0.44	32	466	1.02	3.54	0.6
31	55	31.91	1	0	1	33	20	3	1	250	1	66	1	1	8	1	0.5	0			0		0		0		7	8	26	6.8	2	4	5.92	79	5.7	28	6.4	0	4.55	0	2.7	1.12	4.06	1.57	34	920	1.53	5.39	0.8
32	51	27.9	0	0	0			13	1	442	0		1	13	4	1	6	1	6	7.5	0		0		0		7	10	24	6.27	1	3	5.73	38	5.1	17	3.9	1	8.14	1	5.2	2.39	3.4	1.16	30	132	1.44	2.87	0.8
33	53	24.44	1	0	1	25	10	3	1	96	1	197	1	0.5	5	1	1	1	1	10	1	1	0		0		6	3	8	5.03	1	2.5	4.12	61	4.5	15.6	5.3	0	3.58	0	1.5	1.74	2.06	0.74	36	328	1.02	1.73	0.7
34	57	26	0	0	0	0	0	2	1	360	1	180	1	0.3	5	0		0			0		0		0		5	14	20	6.07	1.35	3	5.73	33	3.6	23	4.9	0	4.94	0	2.8	1.94	2.55	0.46	32	227	1.18	1.5	1.1
35	57	30.82	0	0	0			2	1	1800	1	201	1	0.3	5	0		0			0		0		0		3	3	5	4.81	0.25	2	4.46	76	3.3	119	5.6	0	3.72	0	2.5	0.7	5.31	1.21	34	562	0.85	4.83	1
36	58	32.02	0	0	0			7	1	890	1	390	0			1	1.5	1	1.5	10	1	1.5	1	2.5	0		6	5	14	5.88	0.38	3	5.07	81	5.1	36.4	5.1	0	5.95	1	4.3	1.3	4.58	0.84	28	297	1.39	3.02	0.8
37	53	21.8	1	1	0	8	20	4.5	1	86	0		1	1	8	1	4	0			0		1	4	1	4	3	0	1	2.88	0.13	2	2.85	26	4	35	4.6	0	4.27	0	2.3	1.66	2.57	0.75	29	438	1.28	2.42	0.8
38	47	20.3	1	0	1	30	20	15	1	488	1	180	1	4	5	1	1	1	2	9	1	1	0		0		5	0	15	4.55	0.75	2	4.09	27	4.9	10.8	5.6	0	5.11	0	3.1	1.59	3.21	0.85	39	237	1.85	1.6	0.6
39	50	32.45	1	1	0	10	20	6	1	45	0		0			1	1	1	4	10	1	1	1	2	0		3	0	4	3.44	0.13	2	2.99	26	2.2	10	5.4	0	3.6	0	1.7	1.6	2.25	0.57	28	206	1.14	3.26	0.8
40	38	29.03	0	0	0			10	0		0		1	2	2	1	0.5	1	0.5	12.5	1	0.5	0		0		2	0	0	1.92	0	1	1.63	15	2.9	4.98	5.3	0	5.21	0	3	1.63	3.2	1.27	33	134	0.96	4.47	0.7
41	35	17.78	1	0	1	10	4	1	1	543	1	100	1	1	5	0		0			0		1	0.5	0		5	5	8	5.45	1	3	4.91	92	4.2	103	4.8	0	3.45	0	2.52	0.8	4.3	0.43	32	677	1	3.37	0.7
42	59	24.8	0	0	0			5	1	1037	1	250	1	5	7.5	1	5	1	2	12.5	1	2	1	1.5	1	1.5	5	0	13	4.78	0.75	3	3.83	47	3.4	7.76	3.6	0	5.28	0	2.9	1.86	2.84	1.1	26	316	2.23	1.81	1
43	34	19.5	1	0	1	15	20		0																									7	2.2	0.21	5.2	0	3.31	0	1.8	1.3	2.55	0.91	31	151	0.24	3.04	0.6
44	34	23.9	0	0	0				0																									7	2.7	2.7	4.1	0	4.54	0	2.5	1.9	2.39	0.38	33	134	0.9	2.38	0.5
45	25	20.6	0	0	0				0																									7	2.1	0.69	4.5	0	3.98	0	2	1.69	2.36	0.63	30	145	0.74	3.59	0.6
46	36	19.82	1	0	1	13	15		0																									9	3.1	0.33	5.1	0	4.7	0	2.4	1.52	3.09	1.62	39	129	0.85	2.73	0.7
47	33	23.51	1	0	1	12	10		0																									6	2.8	1.79	4.4	0	5.2	0	2.7	1.81	2.87	1.5	32	129	0.99	3.04	0.7
48	36	33.46	1	0	1	15	5		0																									7	2.5	1.53	4.9	0	5.37	0	2.5	1.57	3.42	2.85	32	139	0.88	3.44	0.7
49	34	21.63	1	0	1	13	20		0																									3	2.4	0.98	5.7	0	4.29	0	2.3	1.44	2.98	1.2	31	135	0.96	2.35	0.6
50	38	23.18	1	0	1	20	15		0																									10	2.8	1.37	4.4	0	4.09	0	2.2	1.73	2.36	0.42	34	136	0.83	1.88	0.7
51	55	21.19	1	0	1	27	20		0																									12	2.4	0.74	6.2	0	5.35	0	3.5	1.34	3.99	1.2	28	120	0.62	0	0.7
52	43	27.1	1	0	1	20	20		0																									22	2.5	0.9	6.3	0	5.35	0	3.4	1.26	4.25	1.45	29	142	0.85	5.2	0.7
53	46	27.85	0	0	0				0																									16	2.8	1.58	5.9	0	5.14	0	3.1	1.73	2.97	0.76	38	125	0.77	3.73	0.9
54	55	22.26	0	0	0				0																									8	2.1	0.77	5	0	6.07	1	4.1	1.53	3.97	0.92	34	131	1.34	2.56	0.7
55	57	30.82	0	0	0				0																									10	3.2	0.97	4.8	0	6.66	1	4.1	1.3	5.12	2.69	34	204	0.92	0	0.8
56	40	19.49	1	1	0	15	10		1	17.7																								7	2.4	0.3	5.1	0	4.25	0	2.5	1.53	2.78	0.56	29	170	0.9	1.09	0.6
57	49	29.34	0	0	0				0																									7	1.7	1.77	5	0	6	1	4.1	1.12	5.36	1.8	32	162	0.91	3.21	0.7
58	55	24.69	0	0	0				0																									3	2.5	0.52	5.5	0	5.74	0	3.7	1.18	4.86	1.91	30	194	1.29	0	0.7
59	59	20.96	0	0	0				0																									10	3	0.54	6.1	0	6.08	1	3.9	1.82	3.34	0.68	30	140	2.62	2.01	0.9
60	54	25	0	0	0				0																									10	2.6	1.03	5.7	1	7.34	1	5.2	1.73	4.24	0.96	33	443	1.68	2.14	0.7
61	58	29.38	1	1	0	10	20		0																									15	2.5	3.75	5.6	1	7	1	5	1.34	5.22	1.52	34	135	0.5	0	0.8
62	27	27.7	0	0	0				0																									10	2.3	4	4.1	0	4.46	0	2.8	1.51	2.95	0.4	31	256	0.9	2.86	0.6
63	43	27.2	1	1	0	10	15		0																									11	2.4	0.79	5.3	1	6.3	1	4.7	1.13	5.58	0.96	33	334	0.98	2.59	0.7
64	51	25	1	1	0	20	5		0																									10	2.4	1.02	5.2	0	5.27	0	3.7	1.27	4.15	0.73	34	127	0.92	2.75	0.7
65	47	29.38	1	0	1	30	30		0																									16	3.9	1.59	6.3	0	5	0	2.5	1.61	3.1	1.88	30	141	0.74	3.57	0.7
66	33	27.89	0	0	0				0																									27	3.8	1.58	4.9	0	5.75	1	3.9	1.54	3.73	0.63	29	125	0.84	3.09	0.6
67	52	22.14	1	0	1	30	10		1	35																								7	2.6	1.08	5.4	0	5.87	1	3.9	1.45	4.05	1.14	31	137	1.39	2.56	0.8
68	50	24.06	0	0	0				0																									6	2.1	0.54	5.2	0	5.24	0	3.3	1.54	3.4	0.9	33	213	1	2.25	0.9
69	57	23.05	0	0	0				0																									35	3.3	2.77	5.7	1	6.5	1	4.2	1.74	3.74	1.31	33	214	1.2	0.57	0.7
70	51	18.87	1	1	0	30	20		0																											1.12	6.5	1	6.91	1	4.4	1.93	3.58	1.34	31	139	1.14	2.81	0.7
71	44	30.49	1	0	1	20	20		0																									17	3.8	8.8	4.8	0	5.74	0	3.5	1.91	3	0.67	32	142	0.95	2.96	0.7
72	54	31.53	1	0	1	30	5		1	18																								18	3.5	15.2	6.6	0	6.04	1	4	1.39	4.35	1.43	35	125	0.84	3.27	0.8
73	52	30.46	1	0	1	30	30		0																									10	2.9	1	5.3	0	5.9	1	4.3	1.1	5.36	1.05	37	172	0.94	1.8	0.8
74	44	21.5	1	0	1	23	40		0																									8			5.1	0	5.01	0	3.6	1.12	4.51	0.57	31	213	0.61	0	0.5
[truncated: 10 more columns]
